# Supplementary material for: Sustainable power generation via hydro-electrochemical effects
Source: Royal Society of Chemistry journal article supplement (doi:10.1039/d1nr07748a), 2022-01-01
Supplement: d1nr07748a1.pdf [file d1nr07748a1.pdf]

# **Supplementary Information**

## **Sustainable Power Generation via Hydro-Electrochemical Effects**

Ahrum Sohn<sup>1</sup>, Yufan Jang<sup>2</sup>, Anirban Chakraborty<sup>1</sup>, Choongho Yu<sup>1,2,\*</sup>

<sup>1</sup>Department of Mechanical Engineering, Texas A&M University, College Station, Texas 77843,  
USA

<sup>2</sup>Department of Materials Science and Engineering, Texas A&M University, College Station,  
Texas 77843, USA

\*Corresponding author, E-mail address: [chyu@tamu.edu](mailto:chyu@tamu.edu)

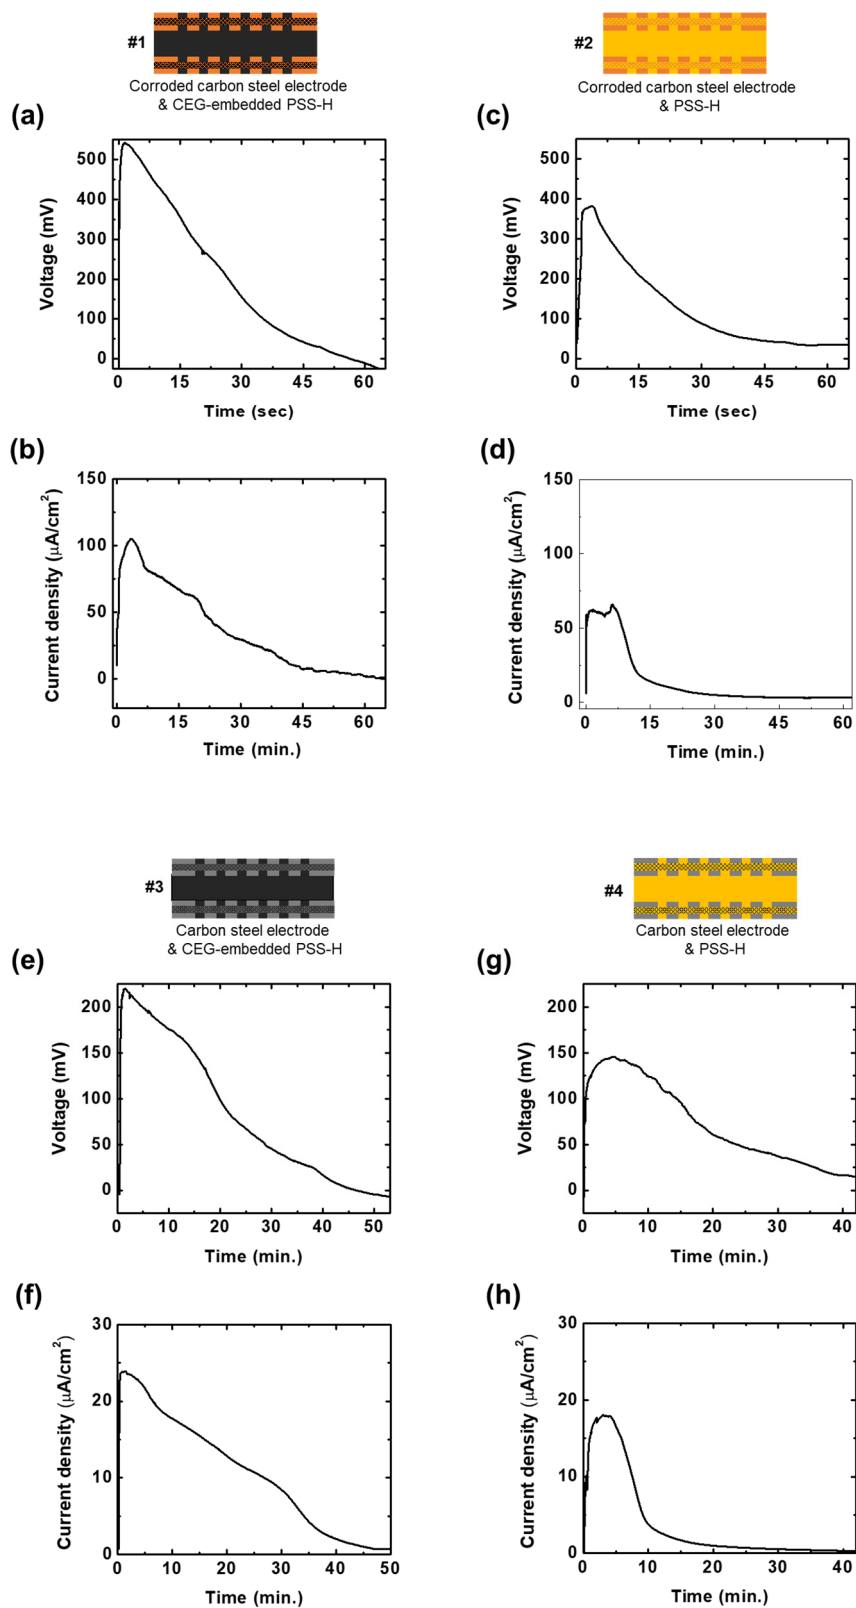

**Figure S1.** Open-circuit voltage and short-circuit current density for device configuration (a,b) #1, (c,d) #2, (e,f) #3, and (g,h) #4.

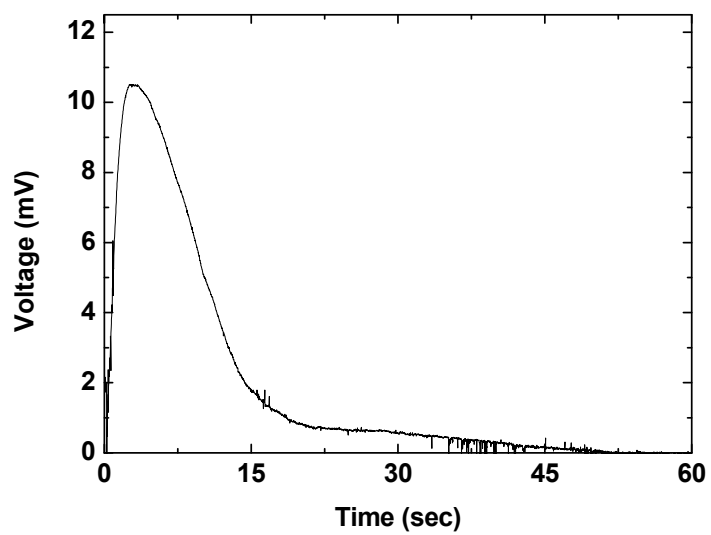

**Figure S2.** Open-circuit voltage of the device with PSS-H as an interlayer and graphite foil as electrodes.

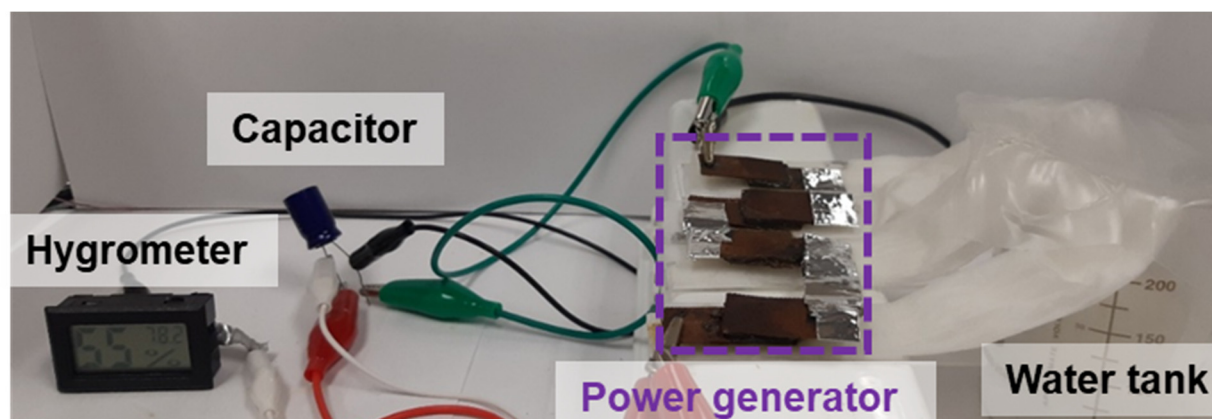

**Figure S3.** A photograph of a setup operating a hygrometer powered by four serially connected hydro-electrochemical power generators.
